# Supplementary material for: Racial microaggressions and interculturality in remote Central Australian Aboriginal healthcare
Source: Springer Nature journal article supplement (doi:10.1186/s12939-023-01897-4), 2023-05-25
Supplement: MOESM1 [file 25405306]

## INTERVIEW GUIDE - HEALTH CARE WORKERS

### BIOGRAPHICAL

- How long have you worked in remote Aboriginal health?
- How long have you worked in this particular community?
- What is the nature of your employment? Casual, Permanent, Locum?
- What services do you provide to this community?

### ROLES, MOTIVATIONS & CLINIC STRUCTURES

- Why did you choose to work in remote Aboriginal Health care?
- What is your experience of working with AHPs or other Aboriginal people in the clinic?
- Have you received any training or guidance about working with Aboriginal people?
- Is there a Health Board or other community structure that has input into decisions about the clinic?
  - Who makes rules about the clinic? Eg: opening times
  - Is it important for Aboriginal people to have a say in clinic management?
  - Who do you think owns the clinic?
- Does this clinic / you go out to pick up people from camp and bring them to the clinic?
  - Is this important?
  - In what circumstances?

- Do you have relationships with Aboriginal people in this community outside of clinic hours?
- Overall, how do you perceive your role?
- Do you think local Aboriginal people see your role as you do?

### COMMUNICATION

- What is the language spoken in this community?
- Have you learned any Aboriginal language?
- Do you think it is helpful to know some language?
- Do you ever use interpreters to help understand your patients?
- Do you think Aboriginal people should be made to speak English?
- Do you think non-Aboriginal people should speak an Aboriginal language?
- Have you had any training about how to speak with Aboriginal people?
- What strategies (verbal or non-verbal) do you use to communicate with Aboriginal patients?
- What style of communication works best for you?

### CULTURAL & HISTORICAL KNOWLEDGE

- What orientation did you receive to work in this community?
  - Remote Aboriginal Health
  - Cultural Orientation
  - In your particular community

## INTERVIEW GUIDE - HEALTH CARE WORKERS

- Do you know anything about the history of this particular community?
- Do you think it is important to know about the history of a community/tribal group?
- How did/do you find out about the history and culture of this community?
- Do you think culture helps or hinders health in this community?
  - Are there any particular beliefs or behaviours that you have identified?
- What do you understand about cultural safety/competency?
- How do you try to ensure your practice is culturally safe?
- How does this clinic/health service ensure cultural safety?
- What do you think is your responsibility toward Aboriginal visitors from other communities?

### MODELS OF HEALTH

- In general, how would you rate the health of Aboriginal people in this community?
- How do you measure health?
- What do you think causes ill health in this community?
- Do you think Aboriginal people care about their health?
- How would you rate the health literacy in this community?
- Do Aboriginal people have a different conception or model of health?
  - If so, what do you know about that?
  - If so, how do you reconcile/work within the different models?

### ATTITUDES AND BEHAVIOURS TOWARD PEOPLE LIVING CHRONIC DISEASE

- Who is primarily responsible for CD/DM management?
- What are your thoughts on clinic involvement in chronic diseases such as DM?
- What attitudes and behaviours of clinical staff enable better chronic disease management?
- Have you had much success with the management of diabetes?
- What do you think is the most important part of managing people living with diabetes (PLWD)?
  
- What are your thoughts on the role of medication in PLWD?
- Are Aboriginal people adherent to medication?
- What strategies might/do improve adherence?
- How do you deal with people who are non-adherent?

### PERSONAL WELLBEING

- How do you look after yourself working in this community?
- Have you ever experienced burnout?
- What things help to sustain you in this type of work?

**If you could influence one thing to promote better health for Aboriginal people in this community what would that be?**

**Any other comments or issues you would like to discuss?**
